# Supplementary material for: Treg cells mediate recovery from EAE by controlling effector T cell proliferation and motility in the CNS
Source: PubMed Central journal article supplement (PMC4268825; doi:10.1186/s40478-014-0163-1), 2014-12-05

Supplementary Fig. 1

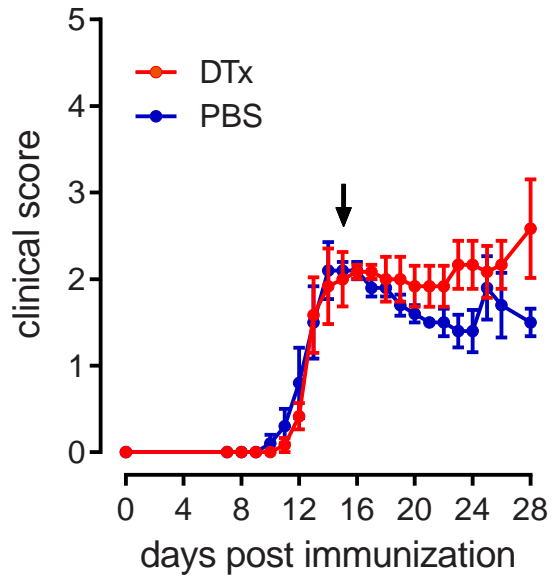

Supplementary Fig. 2

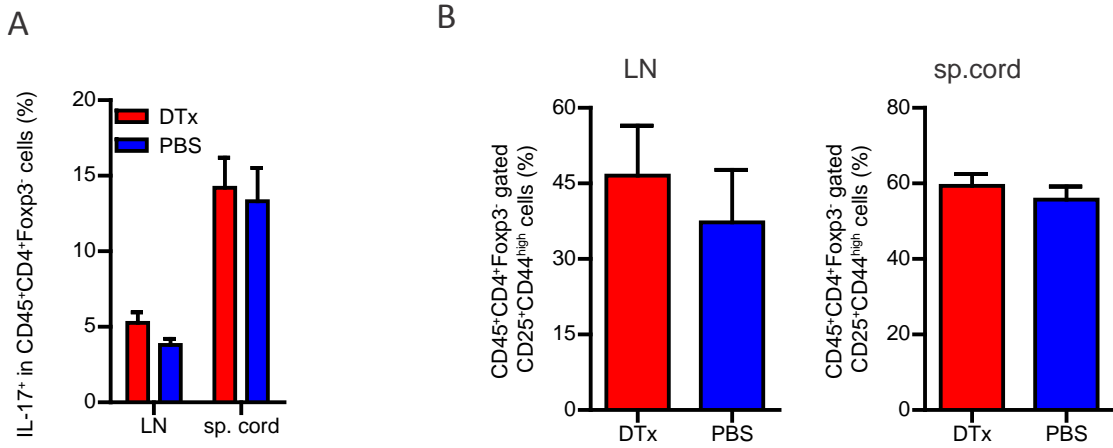

Supplementary Fig. 3

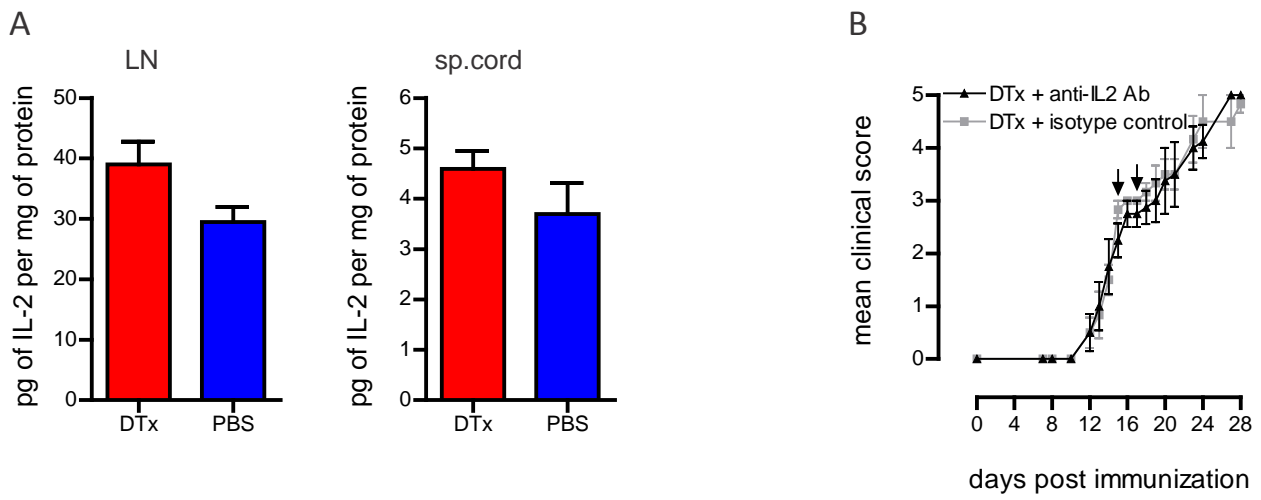

Supplement: 40478_2014_163_MOESM1_ESM.pdf [file 40478_2014_163_MOESM1_ESM.pdf]
